# Periodontal Disease Bacteria Specific to Tonsil in IgA Nephropathy Patients Predicts the Remission by the Treatment

Yasuyuki Nagasawa<sup>1,2,\*</sup>, Kenichiro Iio<sup>1,3</sup>, Shinji Fukuda<sup>3,4,7</sup>, Yasuhiro Date<sup>3,5</sup>, Hirotsugu Iwatani<sup>1</sup>, Ryohei Yamamoto<sup>1</sup>, Arata Horii<sup>6</sup>, Hidenori Inohara<sup>6</sup>, Enyu Imai<sup>1</sup>, Takeshi Nakanishi<sup>2</sup>, Hiroshi Ohno<sup>3,4</sup>, Hiromi Rakugi<sup>1</sup>, Yoshitaka Isaka<sup>1</sup>

**1** Department of Geriatric Medicine and Nephrology, Osaka University, Graduate School of Medicine, Yamada-oka, Suita, Osaka, Japan, **2** Division of Kidney and Dialysis, Department of Internal Medicine, Hyogo College of Medicine, Mukogawa-cho, Nishinomiya, Japan, **3** Laboratory for Epithelial Immunobiology, RIKEN Research Center for Allergy and Immunology, Suehiro-cho, Tsurumi-ku, Yokohama, Kanagawa, Japan, **4** Graduate School of Nanobioscience, Yokohama City University, Suehiro-cho, Tsurumi-ku, Yokohama, Kanagawa, Japan, **5** Department of Life Science and Medical Bioscience, Waseda University, Wakamatsu-cho, Shinjuku-ku, Tokyo, Japan, **6** Department of Otolaryngology, Osaka University, Graduate School of Medicine, Yamada-oka, Suita, Osaka, Japan, **7** Institute for Advanced Biosciences, Keio University, Mizukami, Kakuganji, Tsuruoka, Yamagata, Japan

## Abstract

**Background:** Immunoglobulin (Ig)A nephropathy (IgAN) is the most common form of primary glomerulonephritis in the world. Some bacteria were reported to be the candidate of the antigen or the pathogenesis of IgAN, but systematic analysis of bacterial flora in tonsil with IgAN has not been reported. Moreover, these bacteria specific to IgAN might be candidate for the indicator which can predict the remission of IgAN treated by the combination of tonsillectomy and steroid pulse.

**Methods and Findings:** We made a comprehensive analysis of tonsil flora in 68 IgAN patients and 28 control patients using Denaturing gradient gel electrophoresis methods. We also analyzed the relationship between several bacteria specific to the IgAN and the prognosis of the IgAN. *Treponema sp.* were identified in 24% IgAN patients, while in 7% control patients ( $P = 0.062$ ). *Haemophilus segnis* were detected in 53% IgAN patients, while in 25% control patients ( $P = 0.012$ ). *Campylobacter rectus* were identified in 49% IgAN patients, while in 14% control patients ( $P = 0.002$ ). Multiple Cox proportional-hazards model revealed that *Treponema sp.* or *Campylobacter rectus* are significant for the remission of proteinuria (Hazard ratio 2.35,  $p = 0.019$ ). There was significant difference in remission rates between IgAN patients with *Treponema sp.* and those without the bacterium ( $p = 0.046$ ), and in remission rates between IgAN patients with *Campylobacter rectus* and those without the bacterium ( $p = 0.037$ ) by Kaplan-Meier analysis. Those bacteria are well known to be related with the periodontal disease. Periodontal bacteria has known to cause immune reaction and many diseases, and also might cause IgA nephropathy.

**Conclusion:** This insight into IgAN might be useful for diagnosis of the IgAN patients and the decision of treatment of IgAN.

**Citation:** Nagasawa Y, Iio K, Fukuda S, Date Y, Iwatani H, et al. (2014) Periodontal Disease Bacteria Specific to Tonsil in IgA Nephropathy Patients Predicts the Remission by the Treatment. PLoS ONE 9(1): e81636. doi:10.1371/journal.pone.0081636

**Editor:** Ali Al-Ahmad, University Hospital of the Albert-Ludwigs-University Freiburg, Germany

**Received:** July 10, 2013; **Accepted:** October 15, 2013; **Published:** January 28, 2014

**Copyright:** © 2014 Nagasawa et al. This is an open-access article distributed under the terms of the Creative Commons Attribution License, which permits unrestricted use, distribution, and reproduction in any medium, provided the original author and source are credited.

**Funding:** This study was supported by grant-in-aid for Young Scientists B (21790809), grant-in-aid for Scientific Research C (22590891), grant from Research Conference of IgA nephropathy, and grant from Osaka kidney bank (OK-3, 2009). The funders had no role in study design, data collection and analysis, decision to publish, or preparation of the manuscript.

**Competing Interests:** The authors have declared that no competing interests exist.

\* E-mail: nagasawa@kid.med.osaka-u.ac.jp

These authors contributed equally to this work.

## Introduction

Immunoglobulin (Ig)A nephropathy (IgAN) is the most common form of primary glomerulonephritis in the world [1]. It is reported to occupy more than a half of the primary glomerulonephritis [2]. It is characterized by IgA deposition to glomerular mesangial cells in pathological point of view and sometimes macroscopic hematuria after upper respiratory infection in clinical point of view. Since it was firstly reported by Berger in 1968 [3], the etiology and cause of the disease has been an ultimate mystery [4], although several genes [5,6] or single nucleotide polymorphism

[7–12] were reported to be associated with incidence or progression of IgA nephropathy. In a couple of decades ago, its prognosis was believed to be rather good, but Koyama et al reported that 39% of the patients with IgAN end up in dialysis or death in 20 years [13,14]. Recently our group reported that 61% of IgAN patients with smoking reached to the 150% elevation of creatine in 15 years [15,16]. Moreover, the occurrence is often seen in the younger generations such as in their teens or twenties, the treatment strategy focusing on the longer term is being a crucial problem.



## Statistical analysis

Normally distributed continuous variables were expressed as mean  $\pm$  SD, and non-normally distributed continuous variables as median (interquartile range). Categorical variables were expressed as numbers (proportions). For comparison between two groups, the t-test was used for normally distributed continuous variables, the Mann-Whitney test for non-normally distributed continuous variables, and  $\chi^2$  test for categorical variables. Kaplan-Meier analysis using log-rank test was used to compare survival rate. We used the Cox proportional hazards model to assess the impact of covariates for the remission of urinary protein and urinary occult blood. The results of the analyses are expressed as hazards ratios with 95% confidence intervals and a P value. P values less than 0.05 were considered statistically significant. All statistical analyses were performed using JMP for windows version 8.0.1 (SAS Institute Inc., Cary, NC, US).

## Results

Clinical characteristics of 68 IgA nephropathy patients and 28 control patients are presented in Table 1. Mean glomerular filtration rate (GFR) in IgA nephropathy patients was 85 ml/min, while mean GFR in control group was 124 ml/min. GFR was calculated using GFR estimated equation [38]. Urinary protein in IgA nephropathy patients was 0.59 (0.38 to 1.04) g/day. There were no significant difference except serum creatinine and eGFR between IgA nephropathy patients and control patients.

All samples including 68 tonsils with IgAN patients and 28 tonsils with control patients were analyzed by PCR-DGGE method followed by PLS-DA. The patterns of the bands in DGGE analysis were scanned and PLS-DA was performed based on the intensity and position of the bands in each lane as shown in Figure 1A. Based on the PLS-DA, 3 bands strongly contributed to the feature of the IgAN, which were shown in original gel in Figure 1B.

These 3 bands were cloned and Bacteria A, B, and C shown in Figure 1B were identified as *Treponema* sp., *Haemophilus segnis*, and *Campylobacter rectus*, respectively. *Treponema* sp. were identified in 24% IgAN patients, while the bacteria were identified in 7% control patients ( $P=0.062$ ). *Haemophilus segnis* were detected in 53% IgAN patients, while the bacteria were identified in 25% control patients ( $P=0.012$ ). *Campylobacter rectus* were identified in 49% IgAN patients, while the bacteria were identified in 14% control patients ( $P=0.002$ ).

The IgAN patients were divided by the presence or absence of the each bacterium, and the patient characteristics were compared between two groups in each bacterium (Table 2). Basically there were no significant difference between IgA nephropathy patients with bacterium and those without bacterium.

Univariate Cox proportional-hazards model for proteinuria revealed that the *Campylobacter rectus* is the significant factor for the remission of proteinuria (Hazard ratio 1.96,  $p=0.041$ ) along with the urinary protein level as known before. *Treponema* sp. is the marginally significant factor for the remission of proteinuria (Hazard ratio 2.08,  $p=0.067$ ). *Campylobacter rectus* or *Treponema* sp. is the strong factor for the remission of proteinuria (Hazard ratio 2.35,  $p=0.011$ ). Multiple Cox proportional-hazards model for proteinuria also revealed that *Treponema* sp. is significant factor for the remission of proteinuria along with proteinuria in Model 1 in table 3 (hazard ratio 2.62,  $p=0.034$ ), and that *Campylobacter rectus* is marginally significant factor (Hazard ratio 1.86,  $p=0.066$ ). *Treponema* sp. or *Campylobacter rectus* are significant for the remission of proteinuria along with urinary protein in Model 2 in Table 3 (Hazard ratio 2.35,  $p=0.019$ ).

The remission rates of proteinuria between patients with bacteria and those without bacteria were analyzed by Kaplan-Meier analysis using log-rank test (Figure 2).

Univariate Cox proportional-hazards model for hematuria revealed that the *Campylobacter rectus* is the significant factor for the remission of occult blood (Hazard ratio 2.35,  $p=0.029$ ). *Treponema* sp. is also the significant factor for the remission of hematuria (Hazard ratio 4.27,  $p=0.004$ ). *Campylobacter rectus* or *Treponema* sp. are the strong factor for the remission of hematuria (Hazard ratio 4.54,  $p<0.001$ ). Multiple Cox proportional-hazards model for hematuria also revealed the similar results as the model for proteinuria (Table 4). The remission rates of hematuria were also analyzed by Kaplan-Meier analysis using log-rank test. The results were similar to the results of the remission rate of proteinuria (Figure 3).

To know whether these bacteria might be related to pathological features which were important predictor of renal prognosis, we evaluated the association between bacteria detected by DGGE analysis and histopathological factors. We scored 30 patients who were performed renal biopsy within a year of tonsillectomy by using oxford classification and compared the scores with clinical features and bacteria. The prevalence of each component of Oxford classification was summarized in Table S1 in Supplementary Tables. We found that there was no relationship between

**Table 1.** Patient characteristics performed by DGGE analysis.

| Baseline characteristics           | IgAN group (n = 68) |             | Control group (n = 28) |           | P       |
|------------------------------------|---------------------|-------------|------------------------|-----------|---------|
| Age (year)                         | 32                  | (27–46)     | 29                     | (22–40)   | 0.107   |
| Female [n(%)]                      | 36                  | /68 (53)    | 13                     | /28 (46)  | 0.896   |
| Systolic blood pressure (mmHg)     | 113                 | $\pm 14$    | 112                    | $\pm 14$  | 0.647   |
| Urinary protein (g/gCr)            | 0.59                | (0.38–1.04) | -                      | -         | -       |
| Serum creatinine (mg/dl)           | 0.9                 | (0.7–1.1)   | 0.7                    | (0.6–0.9) | 0.002*  |
| eGFR (ml/min/1.73 m <sup>2</sup> ) | 85                  | $\pm 29$    | 124                    | $\pm 40$  | <0.001* |
| Serum IgA (mg/dl)                  | 316                 | (238–381)   | 297                    | (215–392) | 0.573   |
| Serum C3 (mg/dl)                   | 127                 | $\pm 24$    | 130                    | $\pm 28$  | 0.688   |
| CRP (mg/dl)                        | 0                   | (0–0.2)     | 0                      | (0–0.2)   | 0.276   |

DGGE, Denaturing Gradient Gel Electrophoresis; eGFR, estimated glomerular filtration rate.

Data are expressed as mean  $\pm$  SD, median (interquartile range).

\* $P<0.05$  by unpaired t test, Wilcoxon signed-ranks test or  $\chi^2$  test.

doi:10.1371/journal.pone.0081636.t001

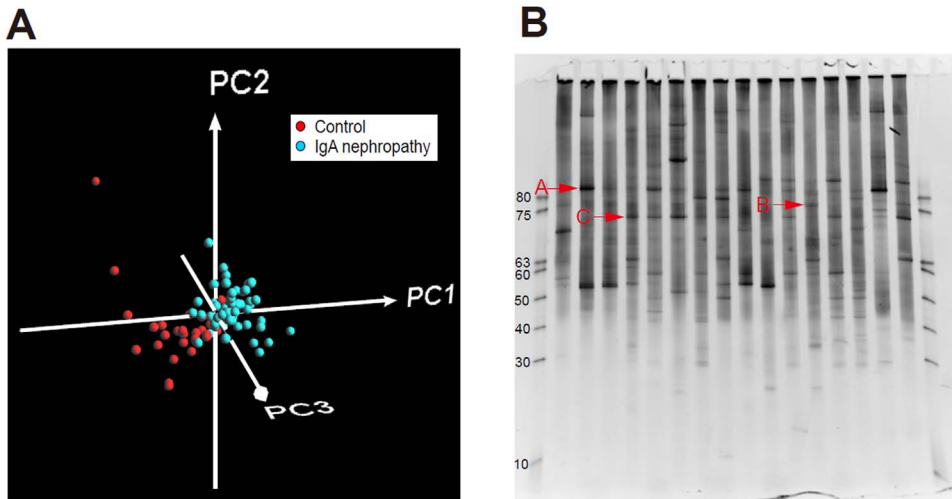

**Figure 1. Comprehensive analysis of tonsil flora of IgA nephropathy patients compared with those of control patients by denaturing gradient gel electrophoresis (DGGE) method (A) Partial least squares-discriminant analysis (PLS-DA) on tonsil-associated bacterial composition in control and IgA nephropathy patient:** Result of PLS-DA on DGGE band data set of each control (red) and IgA nephropathy patient (blue) are shown (n = 68 and 28, respectively). Proportions of the first (PC1), second (PC2), and third (PC3) components are 50.1%, 13.3%, and 3.78%, respectively. **(B) Results of PCR-Denaturing gradient gel electrophoresis (DGGE) analysis:** Specific DGGE bands in IgA nephropathy patients were shown as A, B, and C. doi:10.1371/journal.pone.0081636.g001

bacteria and histological factors (Table S2, S3 in Supplementary Tables).

**Discussion**

In this study, we comprehensively compared the bacterial flora of the tonsil between IgAN and chronic tonsillitis patients using PCR-DGGE and PLS-DA, and revealed that *Treponema* sp., *Haemophilus segnis*, and *Campylobacter rectus* are specific to IgAN patients. Moreover, we found the remission rates of proteinuria and hematuria were significantly related with the prevalence infection of *Treponema* sp. and *Campylobacter rectus*, both of which were reported to be the cause of periodontal disease [39–41], while the existence of *Haemophilus segnis* had no

relationship with clinical course. This result suggests that the detection of bacteria by DGGE analysis could predict the therapeutic effect of tonsillectomy and steroid pulse therapy, and they might reflect the abnormal mucosal immunity in tonsil.

One of clinical manifestations of the IgAN is the macrohematuria soon after the tonsillitis. This feature indicated the relationship between infection in tonsils and IgAN. *Haemophilus parainfluenzae* was reported to be more commonly isolated from the pharynx of patients with IgAN than from those with other diseases [28]. In this studies, *Haemophilus parainfluenzae* was confirmed by cultural and antibody methods. These methods could detect the *Haemophilus segnis* as *Haemophilus parainfluenzae*, because of antigen similarity [42]. In our study, tonsils with 53% of IgA patients might be infected by *Haemophilus segnis* which are same as the

**Table 2. Patient characteristics in each bacterial flora.**

| Baseline characteristics           | IgAN all (n = 59) | <i>Treponema</i> sp. |                   | <i>Haemophilus segnis</i> |                   | <i>Campylobacter rectus</i> |                   |
|------------------------------------|-------------------|----------------------|-------------------|---------------------------|-------------------|-----------------------------|-------------------|
|                                    |                   | Positive (n = 12)    | Negative (n = 47) | Positive (n = 31)         | Negative (n = 28) | Positive (n = 26)           | Negative (n = 33) |
| Age (year)                         | 32 (26–46)        | 36 (24–43)           | 31 (26–46)        | 32 (23–45)                | 32 (27–46)        | 31 (27–48)                  | 33 (23–44)        |
| Female [n(%)]                      | 33/59(56)         | 6/12(50)             | 27/47(57)         | 17/31(55)                 | 16/28(57)         | 14/26(54)                   | 19/33(58)         |
| Systolic blood pressure (mmHg)     | 113 ± 14          | 119 ± 12             | 111 ± 14          | 110 ± 15                  | 115 ± 13          | 113 ± 13                    | 113 ± 15          |
| Use of RAS blockade [n(%)]         | 29/59(49)         | 5/12(42)             | 24/47(51)         | 15/31(48)                 | 14/28(50)         | 12/26(46)                   | 17/33(52)         |
| Urinary protein (g/gCr)            | 0.60 (0.40–0.99)  | 0.46 (0.30–0.46)     | 0.66 (0.43–1.08)  | 0.66 (0.42–0.94)          | 0.53 (0.38–1.06)  | 0.51 (0.40–0.88)            | 0.66 (0.40–1.04)  |
| Serum creatinine (mg/dl)           | 0.9 (0.7–1.1)     | 0.8 (0.7–0.9)        | 0.9 (0.7–1.1)     | 0.9 (0.7–1.1)             | 0.9 (0.7–1.1)     | 0.8 (0.7–1.1)               | 0.9 (0.7–1.1)     |
| eGFR (ml/min/1.73 m <sup>2</sup> ) | 87 ± 29           | 93 ± 27              | 86 ± 30           | 89 ± 30                   | 85 ± 29           | 88 ± 30                     | 86 ± 30           |
| Serum total cholesterol (mg/dl)    | 196 (182–235)     | 216 (188–256)        | 195 (176–232)     | 191 (178–226)             | 210 (183–246)     | 195 (184–223)               | 198 (173–246)     |
| Serum IgA (mg/dl)                  | 300 (230–367)     | 347 (220–404)        | 299 (231–349)     | 300 (239–372)             | 296 (220–349)     | 320 (242–371)               | 288 (219–348)     |
| Serum C3 (mg/dl)                   | 126 ± 24          | 128 ± 19             | 125 ± 25          | 127 ± 25                  | 125 ± 23          | 119 ± 20                    | 131 ± 25          |

RAS, renin angiotension system; eGFR, estimated glomerular filtration rate; Data are expressed as mean ± SD, median (interquartile range). doi:10.1371/journal.pone.0081636.t002

**Table 3.** Multivariate Cox proportional-hazards regression model for urinary protein remission rate.

| Baseline characteristics                     | Model 1 |                |         | Model 2 |                |         |
|----------------------------------------------|---------|----------------|---------|---------|----------------|---------|
|                                              | HR      | 95% CI         | P-value | HR      | 95% CI         | P-value |
| Age (per 10 year of age)                     | 1.04    | (0.75 to 1.44) | 0.825   | 1.08    | (0.79 to 1.47) | 0.644   |
| Female (versus male)                         | 0.65    | (0.31 to 1.33) | 0.236   | 0.71    | (0.35 to 1.46) | 0.354   |
| Systolic blood pressure (per 10 mmHg)        | 0.87    | (0.65 to 1.16) | 0.334   | 0.90    | (0.69 to 1.18) | 0.434   |
| Use of RAS blockade                          | 0.94    | (0.45 to 1.96) | 0.870   | 0.91    | (0.44 to 1.88) | 0.796   |
| Urinary protein (per 1.0 g/gCr)              | 0.55    | (0.31 to 0.97) | 0.039*  | 0.56    | (0.32 to 1.00) | 0.051   |
| eGFR (per 10 ml/min/1.73 m <sup>2</sup> )    | 0.95    | (0.82 to 1.10) | 0.531   | 0.96    | (0.84 to 1.11) | 0.625   |
| Bacterial flora detected by DGGE analysis    |         |                |         |         |                |         |
| <i>Treponema sp.</i>                         | 2.62    | (1.07 to 6.38) | 0.034*  | -       | -              | -       |
| <i>Haemophilus segnis</i>                    | 1.39    | (0.67 to 2.87) | 0.377   | 1.18    | (0.61 to 2.30) | 0.625   |
| <i>Campylobacter rectus</i>                  | 1.86    | (0.96 to 3.60) | 0.066   | -       | -              | -       |
| <i>Treponema sp. or Campylobacter rectus</i> | -       | -              | -       | 2.35    | (1.15 to 4.78) | 0.019*  |

HR, hazard ratio; CI, confidence interval; RAS, renin angiotension system; eGFR, estimated glomerular filtration rate; DGGE, Denaturing Gradient Gel Electrophoresis.

\*Statistically significant.

doi:10.1371/journal.pone.0081636.t003

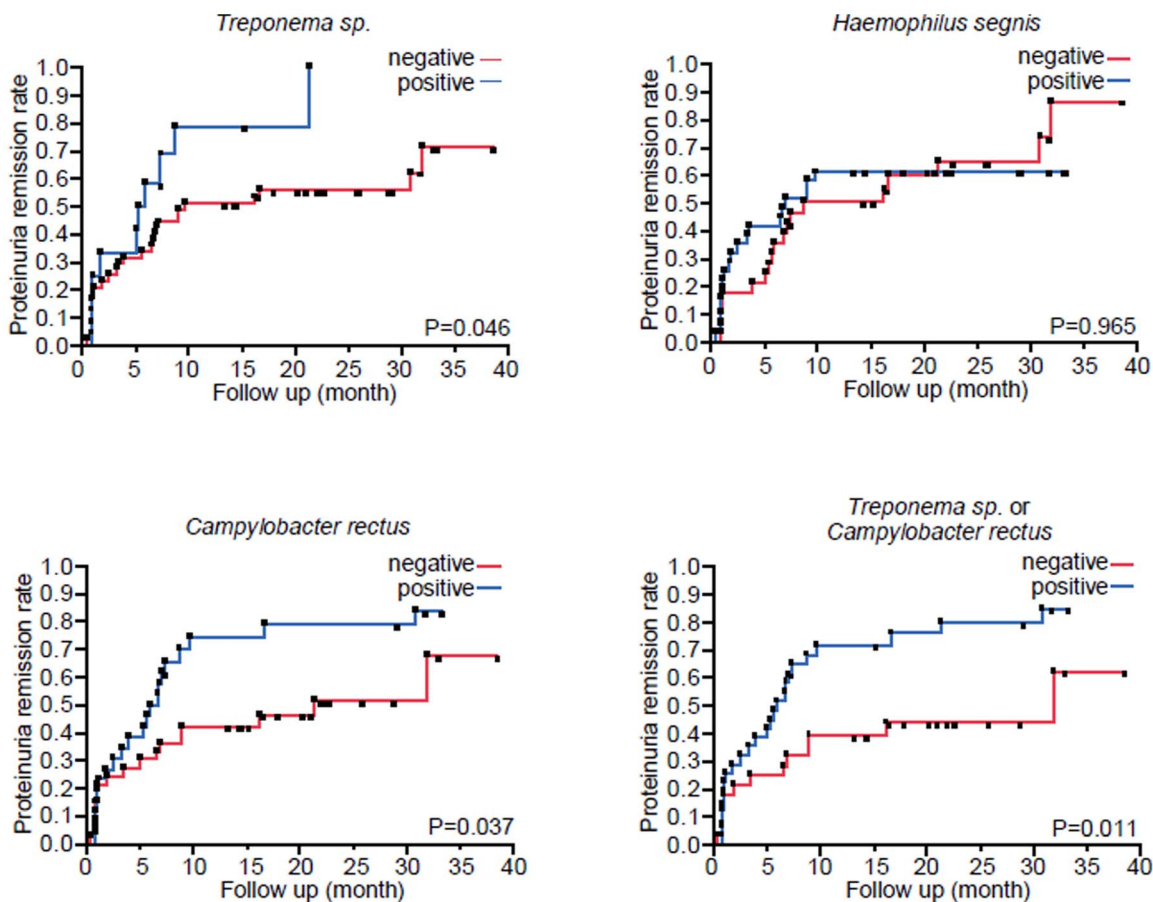

**Figure 2.** Associations between urinary protein remission and distinct kinds of bacteria; *Treponema sp.*, *Haemophilus segnis*, *Campylobacter rectus*, and *Treponema sp. or Campylobacter rectus*. Differences in urinary protein remission with or without bacterial flora were compared using Kaplan-Meier curves and tested using log-rank. P<0.05 was considered to be statistically significant.

doi:10.1371/journal.pone.0081636.g002



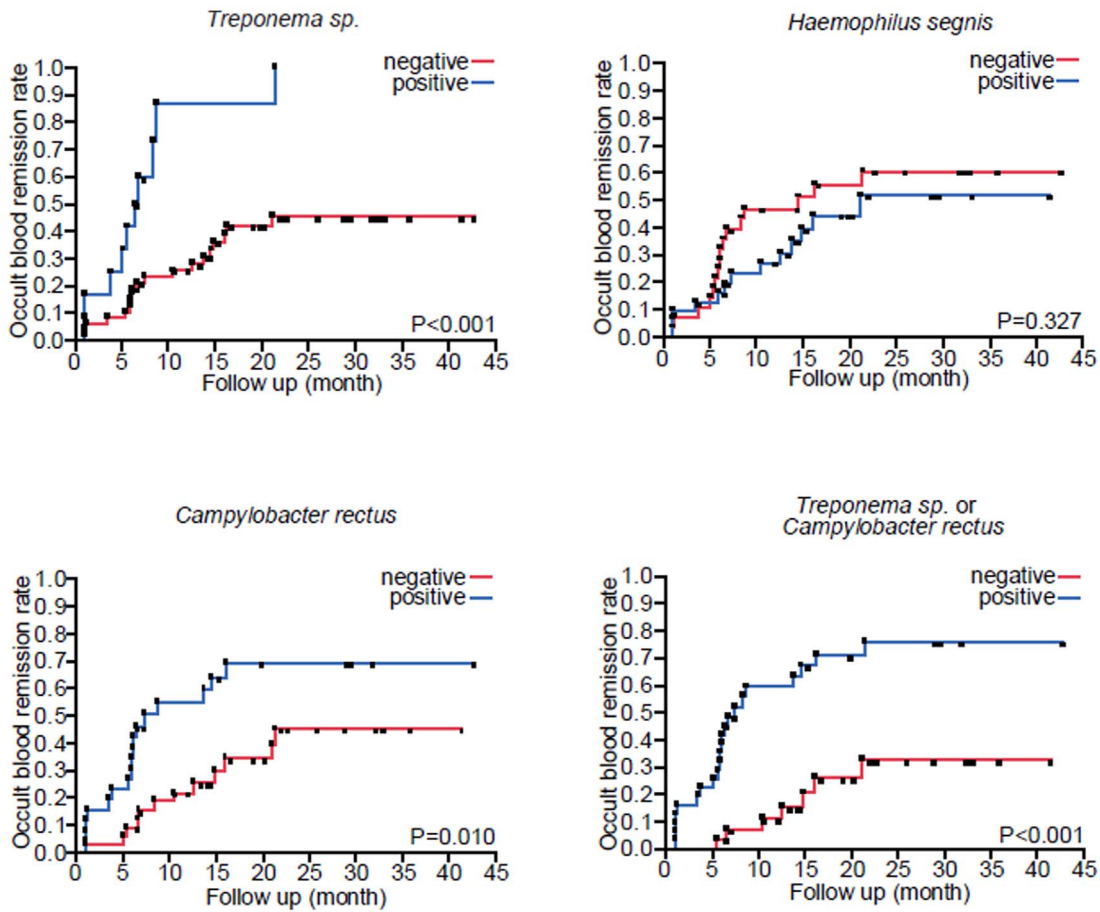

**Figure 3. Associations between urinary occult blood remission and distinct kinds of bacteria; *Treponema sp.*, *Haemophilus segnis*, *Campylobacter rectus*, and *Treponema sp. or Campylobacter rectus*.** Differences in urinary occult blood remission with or without bacterial flora were compared using Kaplan-Meier curves and tested using log-rank. P<0.05 was considered to be statistically significant. doi:10.1371/journal.pone.0081636.g003

**Table 4. Multivariate Cox proportional-hazards regression model for urinary occult blood remission rate.**

| Baseline characteristics                     | Model 1 |                 |         | Model 2 |                 |         |
|----------------------------------------------|---------|-----------------|---------|---------|-----------------|---------|
|                                              | HR      | 95% CI          | P-value | HR      | 95% CI          | P-value |
| Age (per 10 year of age)                     | 0.90    | (0.61 to 1.28)  | 0.569   | 0.96    | (0.68 to 1.34)  | 0.798   |
| Female (versus male)                         | 1.10    | (0.53 to 2.71)  | 0.820   | 1.45    | (0.65 to 3.26)  | 0.366   |
| Systolic blood pressure (per 10 mmHg)        | 0.95    | (0.96 to 1.03)  | 0.766   | 0.99    | (0.74 to 1.33)  | 0.953   |
| Use of RAS blockade                          | 0.98    | (0.42 to 2.46)  | 0.970   | 0.84    | (0.37 to 1.93)  | 0.685   |
| Urinary protein (per 1.0 g/gCr)              | 0.89    | (0.55 to 1.34)  | 0.614   | 0.97    | (0.61 to 1.54)  | 0.882   |
| eGFR (per 10 ml/min/1.73 m <sup>2</sup> )    | 0.97    | (0.82 to 1.15)  | 0.718   | 0.98    | (0.83 to 1.16)  | 0.822   |
| Bacterial flora detected by DGGE analysis    |         |                 |         |         |                 |         |
| <i>Treponema sp.</i>                         | 4.27    | (1.43 to 10.55) | 0.004*  | -       | -               | -       |
| <i>Haemophilus segnis</i>                    | 1.07    | (0.45 to 2.52)  | 0.878   | 0.91    | (0.42 to 1.95)  | 0.800   |
| <i>Campylobacter rectus</i>                  | 2.35    | (0.98 to 4.68)  | 0.029*  | -       | -               | -       |
| <i>Treponema sp. or Campylobacter rectus</i> | -       | -               | -       | 4.54    | (1.85 to 11.12) | 0.001*  |

HR, hazard ratio; CI, confidence interval; RAS, renin angiotension system; eGFR, estimated glomerular filtration rate; DGGE, Denaturing Gradient Gel Electrophoresis. \*Statistically significant.

doi:10.1371/journal.pone.0081636.t004

previous reports [28,43]. There is no report that the relationship between *Haemophilus parainfluenzae* and the prognosis of IgAN, which is compatible with our results.

*Treponema sp.* and *Campylobacter rectus* were newly detected bacteria to be associated with IgAN in this report. These bacteria belong to the anaerobic bacterium species and were reported to be the cause of periodontal disease [39–41]. This is the reason why these two bacteria could not be detected by the usual culture method in the previous reports in IgAN research [28]. The method we employed in this study is DGGE method, which make it possible for us to detect comprehensive bacterial flora, including anaerobic bacteria. In the young generation, especially in babyhood, human beings are usually free from periodontal bacteria, and also free from IgAN. *Campylobacter rectus* get dominant from the age of nine in the periodontal area, and *Treponema denticola* and *Treponema forsythensis* gets dominant from the age of five [44]. Kappa statistic analysis between these periodontal bacteria in mother and those in children showed high value, suggesting that mother and children often have the same periodontal bacteria [44]. This might explain that IgAN sometimes can be seen in the same family, although the gene related with IgAN can also partially explain this phenomenon [45].

These are two interpretations of the relationship between those three bacteria and IgAN. One possibility is that these three bacteria have causality of IgAN. The membrane antigens of *Haemophilus parainfluenzae* was reported to induce the IgAN in mice from 30 to 40 weeks of age [46]. Our data suggested that *Treponema sp.* and *Campylobacter rectus* which could cause periodontal disease have stronger association with IgAN, so there is possibility that these two bacteria might have stronger causality of IgAN than *Haemophilus parainfluenzae*. Periodontal disease was reported to have an interaction between bacterial infection in periodontal area and the degree of the systemic inflammatory response [47]. In addition, the activation of the toll like receptor (TLR) 9 which recognizes bacterial CpG-DNA was reported to affect the severity of IgAN [48], and constitutive TLR signaling by intestinal commensal microflora caused glomerulonephritis [49]. These reports speculate that interaction between host immune system and bacteria, which cause constitutive stimulation of TLR in the tonsil, might cause IgAN.

The second possibility is that these bacteria are simply associated with IgAN. Tonsil in the patients with IgAN had several features, such as structural changes [27] and gene expression change [26], resulting in the change of immune response [26,50–52]. Those immune changes in tonsil might allow the specific bacteria to grow in tonsil, such as these three bacteria. In this explanation, the existence of these three bacteria might be a result of the tonsil condition in IgAN.

Recently many reports suggested that periodontal disease associates with atherosclerosis diseases such as coronary artery disease [53–58] and progression of chronic renal disease [59,60]. Basically, the relationship between atherosclerosis diseases and periodontal diseases are explained by the inflammatory mechanism [56]. There are also several reports suggesting the relationship between the periodontal disease and autoimmune disease such as rheumatoid arthritis [61,62]. This relationship was explained by autoimmune response to the periodontal bacteria [63]. The periodontal bacteria were directly detected in athermanous plaque [64,65]. The component of streptococcus was reported to be directly involved in hemorrhage stroke [64]. These reports suggested the periodontal disease might have more pathogenicity than chronic inflammatory response. Moreover, some periodontal pathogen directly altered T-cell response [66].

Our data suggested that the periodontal bacteria might have strong association with IgAN, one of most common renal disease rather than with histological components. The continued infections by these periodontal bacteria might stimulate IgA production by T cells in tonsil, resulting in the IgA which has some errors in their glycosylation. The IgA with abnormal glycosylation had been reported to have ability to bind to the glomeruli in IgA nephropathy [4,67]. The tonsillectomy and steroid pulse might normalize the IgA production and glycosylation of IgA [68], resulting in the remission of IgA nephropathy. Therefore, these bacteria might be associated with IgA nephropathy and its clinical course after treatment.

In this study, there are several limitations. First, this study is designed as the retrospective manner. Prospective study should be designed to confirm these results, although the tonsils from IgA patients were obtained before the clinical outcomes including urinary protein and hematuria are confirmed. Second, it is hard to distinguish causality from association according to the relationship between the bacteria specific to IgAN and clinical course, as described above. Further study is required to confirm that these bacteria might cause IgAN in experimental mice. However, this study showed that these bacteria are located at least close to the origin of IgAN. Third, *Treponema sp.* includes many species. According to our data, *Treponema sp.* might be *Treponema denticola*, but it is not confirmative. Although it is hard to identify the bacteria from *Treponema sp.*, the basic relationship between the bacteria and the clinical course or IgAN itself is confirmative from our data. Forth, there is some possibility that some unknown factors might attenuate the PCR efficacy in DGGE analysis of tonsil flora, although the primers which used in our study are standard primer in this method [33]. There was no report which confirmed the PCR efficacy in DGGE method in tonsil flora analysis, although we compared the results of DGGE analysis in tonsils with IgA nephropathy to those with tonsillitis, so the effect of unknown factors should be counterbalanced by the comparison step.

In conclusion, *Treponema sp.*, *Haemophilus parainfluenzae*, *Campylobacter rectus* are specific to the tonsils in patients with IgAN. The existence of *Treponema sp.* and *Campylobacter rectus* in tonsil is the strong and significant indicator of remission of IgAN treated with tonsillectomy and steroid pulse. This insight into IgAN might be useful for diagnosis of the IgAN patients and the decision of treatment of IgAN.

## Supporting Information

**File S1** Table S1. Pathologic features in patients diagnosed IgA nephropathy by renal biopsy within a year of tonsillectomy (n = 30). Table S2. Clinical characteristics in patients diagnosed IgA nephropathy by renal biopsy within a year of tonsillectomy according to mesangial hypertrophy and endocapillary hypercellularity. Table S3. Clinical characteristics in patients diagnosed IgA nephropathy by renal biopsy within a year of tonsillectomy according to segmental glomerulosclerosis and tubular atrophy/interstitial fibrosis. (DOCX)

## Author Contributions

Conceived and designed the experiments: YN KI SF RY AH YI. Performed the experiments: YN KI SF YD HI AH. Analyzed the data: KI SF YD RY. Contributed reagents/materials/analysis tools: YN HI RY AH HI TN HO HR EI YI. Wrote the paper: YN KI SF HI RY AH TN HO HR EI YI.

## References

- Pettersson E (1997) IgA nephropathy: 30 years on. *J Intern Med* 242: 349–353.
- Nair R, Walker PD (2006) Is IgA nephropathy the commonest primary glomerulopathy among young adults in the USA? *Kidney Int* 69: 1455–1458.
- Berger J, Hinglais N (1968) [Intercapillary deposits of IgA-IgG]. *J Urol Nephrol (Paris)* 74: 694–695.
- Wyatt RJ, Julian BA (2013) IgA nephropathy. *N Engl J Med* 368: 2402–2414.
- Kiryuk K, Li Y, Sanna-Cherchi S, Rohanizadegan M, Suzuki H, et al. (2012) Geographic differences in genetic susceptibility to IgA nephropathy: GWAS replication study and geospatial risk analysis. *PLoS Genet* 8: e1002765.
- Gharavi AG, Kiryuk K, Choi M, Li Y, Hou P, et al. (2011) Genome-wide association study identifies susceptibility loci for IgA nephropathy. *Nat Genet* 43: 321–327.
- Holmes LV, Strain L, Staniforth SJ, Moore I, Marchbank K, et al. (2013) Determining the population frequency of the CFHR3/CFHR1 deletion at 1q32. *PLoS One* 8: e60352.
- Zhou XJ, Cheng FJ, Qi YY, Zhao YF, Hou P, et al. (2013) FCGR2B and FCRLB gene polymorphisms associated with IgA nephropathy. *PLoS One* 8: e61208.
- Yamamoto R, Nagasawa Y, Shoji T, Katakami N, Ohtoshi K, et al. (2012) A candidate gene approach to genetic contributors to the development of IgA nephropathy. *Nephrol Dial Transplant* 27: 1020–1030.
- Shinzawa M, Yamamoto R, Nagasawa Y, Shoji T, Obi Y, et al. (2012) Gene polymorphisms contributing to hypertension in immunoglobulin A nephropathy. *Clin Exp Nephrol* 16: 250–258.
- Yamamoto R, Nagasawa Y, Shoji T, Inoue K, Uchata T, et al. (2009) A candidate gene approach to genetic prognostic factors of IgA nephropathy—a result of Polymorphism REsearch to Distinguish genetic factors Contributing To progression of IgA Nephropathy (PREDICT-IgAN). *Nephrol Dial Transplant* 24: 3686–3694.
- Vuong MT, Gunnarsson I, Lundberg S, Svenungsson E, Wranner L, et al. (2010) Genetic risk factors in lupus nephritis and IgA nephropathy—no support of an overlap. *PLoS One* 5: e10559.
- Koyama A, Igarashi M, Kobayashi M (1997) Natural history and risk factors for immunoglobulin A nephropathy in Japan. Research Group on Progressive Renal Diseases. *Am J Kidney Dis* 29: 526–532.
- Lee H, Kim DK, Oh KH, Joo KW, Kim YS, et al. (2012) Mortality of IgA nephropathy patients: a single center experience over 30 years. *PLoS One* 7: e51225.
- Yamamoto R, Nagasawa Y, Shoji T, Iwatani H, Hamano T, et al. (2010) Cigarette smoking and progression of IgA nephropathy. *Am J Kidney Dis* 56: 313–324.
- Nagasawa Y, Yamamoto R, Rakugi H, Isaka Y (2012) Cigarette smoking and chronic kidney diseases. *Hypertens Res* 35: 261–265.
- Donadio JV, Grande JP (2002) IgA nephropathy. *N Engl J Med* 347: 738–748.
- Hotta O, Miyazaki M, Furuta T, Tomioka S, Chiba S, et al. (2001) Tonsillectomy and steroid pulse therapy significantly impact on clinical remission in patients with IgA nephropathy. *Am J Kidney Dis* 38: 736–743.
- Miyazaki M, Hotta O, Komatsuda A, Nakai S, Shoji T, et al. (2007) A multicenter prospective cohort study of tonsillectomy and steroid therapy in Japanese patients with IgA nephropathy: a 5-year report. *Contrib Nephrol* 157: 94–98.
- Komatsu H, Fujimoto S, Hara S, Sato Y, Yamada K, et al. (2008) Effect of tonsillectomy plus steroid pulse therapy on clinical remission of IgA nephropathy: a controlled study. *Clin J Am Soc Nephrol* 3: 1301–1307.
- Xie Y, Nishi S, Ueno M, Imai N, Sakatsume M, et al. (2003) The efficacy of tonsillectomy on long-term renal survival in patients with IgA nephropathy. *Kidney Int* 63: 1861–1867.
- Appel GB, Waldman M (2006) The IgA nephropathy treatment dilemma. *Kidney Int* 69: 1939–1944.
- Xie J, Kiryuk K, Wang W, Wang Z, Guo S, et al. (2012) Predicting progression of IgA nephropathy: new clinical progression risk score. *PLoS One* 7: e38904.
- Kim SJ, Koo HM, Lim BJ, Oh HJ, Yoo DE, et al. (2012) Decreased circulating C3 levels and mesangial C3 deposition predict renal outcome in patients with IgA nephropathy. *PLoS One* 7: e40495.
- Zhou YH, Tang LG, Guo SL, Jin ZC, Wu MJ, et al. (2011) Steroids in the treatment of IgA nephropathy to the improvement of renal survival: a systematic review and meta-analysis. *PLoS One* 6: e18788.
- Iio K, Nagasawa Y, Iwatani H, Yamamoto R, Horii A, et al. (2010) Microarray analysis of tonsils in immunoglobulin A nephropathy patients. *Biochem Biophys Res Commun* 393: 565–570.
- Xie Y, Chen X, Nishi S, Narita I, Gejyo F (2004) Relationship between tonsils and IgA nephropathy as well as indications of tonsillectomy. *Kidney Int* 65: 1135–1144.
- Suzuki S, Nakatomi Y, Sato H, Tsukada H, Arakawa M (1994) Haemophilus parainfluenzae antigen and antibody in renal biopsy samples and serum of patients with IgA nephropathy. *Lancet* 343: 12–16.
- Kusano K, Tokunaga O, Ando T, Inokuchi A (2007) *Helicobacter pylori* in the palatine tonsils of patients with IgA nephropathy compared with those of patients with recurrent pharyngotonsillitis. *Hum Pathol* 38: 1788–1797.
- Iwama H, Horikoshi S, Shirato I, Tomino Y (1998) Epstein-Barr virus detection in kidney biopsy specimens correlates with glomerular mesangial injury. *Am J Kidney Dis* 32: 785–793.
- Pozzi C, Bolasco PG, Fogazzi GB, Andrulli S, Altieri P, et al. (1999) Corticosteroids in IgA nephropathy: a randomised controlled trial. *Lancet* 353: 883–887.
- Pozzi C, Andrulli S, Del Vecchio L, Melis P, Fogazzi GB, et al. (2004) Corticosteroid effectiveness in IgA nephropathy: long-term results of a randomized, controlled trial. *J Am Soc Nephrol* 15: 157–163.
- Yu Z, Morrison M (2004) Comparisons of different hypervariable regions of rrs genes for use in fingerprinting of microbial communities by PCR-denaturing gradient gel electrophoresis. *Appl Environ Microbiol* 70: 4800–4806.
- Muyzer G, Brinkhoff T, Nübel U., Santegeeds C., Schäfer H, et al. (1998) Denaturing gradient gel electrophoresis in microbial ecology. *Molecular Microbial Ecology Manual*, Vol 344 (Akkermans, A, van Elsas, J D and de Bruijn, F, eds).
- Tian C, Chikayama E, Tsuboi Y, Kuromori T, Shinozaki K, et al. (2007) Top-down phenomics of *Arabidopsis thaliana*: metabolic profiling by one- and two-dimensional nuclear magnetic resonance spectroscopy and transcriptome analysis of albino mutants. *J Biol Chem* 282: 18532–18541.
- Catran DC, Coppo R, Cook HT, Feehally J, Roberts IS, et al. (2009) The Oxford classification of IgA nephropathy: rationale, clinicopathological correlations, and classification. *Kidney Int* 76: 534–545.
- Roberts IS, Cook HT, Troyanov S, Alpers CE, Amore A, et al. (2009) The Oxford classification of IgA nephropathy: pathology definitions, correlations, and reproducibility. *Kidney Int* 76: 546–556.
- Levey AS, Coresh J, Greene T, Stevens LA, Zhang YL, et al. (2006) Using standardized serum creatinine values in the modification of diet in renal disease study equation for estimating glomerular filtration rate. *Ann Intern Med* 145: 247–254.
- Thompson SA (2002) *Campylobacter* surface-layers (S-layers) and immune evasion. *Ann Periodontol* 7: 43–53.
- Okuda K, Kimizuka R, Katakura A, Nakagawa T, Ishihara K (2003) Ecological and immunopathological implications of oral bacteria in *Helicobacter pylori*-infected disease. *J Periodontol* 74: 123–128.
- Siqueira JF, Jr., Rocas IN (2004) *Treponema* species associated with abscesses of endodontic origin. *Oral Microbiol Immunol* 19: 336–339.
- Lau SK, Woo PC, Mok MY, Teng JL, Tam VK, et al. (2004) Characterization of *Haemophilus segnis*, an important cause of bacteremia, by 16S rRNA gene sequencing. *J Clin Microbiol* 42: 877–880.
- Ogura Y, Suzuki S, Shirakawa T, Masuda M, Nakamura H, et al. (2000) *Haemophilus parainfluenzae* antigen and antibody in children with IgA nephropathy and Henoch-Schönlein nephritis. *Am J Kidney Dis* 36: 47–52.
- Kobayashi N, Ishihara K, Sugihara N, Kusumoto M, Yakushiji M, et al. (2008) Colonization pattern of periodontal bacteria in Japanese children and their mothers. *J Periodontol Res* 43: 156–161.
- Gharavi AG, Yan Y, Scolari F, Schena FP, Frasca GM, et al. (2000) IgA nephropathy, the most common cause of glomerulonephritis, is linked to 6q22-23. *Nat Genet* 26: 354–357.
- Yamamoto C, Suzuki S, Kimura H, Yoshida H, Gejyo F (2002) Experimental nephropathy induced by *Haemophilus parainfluenzae* antigens. *Nephron* 90: 320–327.
- D'Aiuto F, Parkar M, Andreou G, Suvan J, Brett PM, et al. (2004) Periodontitis and systemic inflammation: control of the local infection is associated with a reduction in serum inflammatory markers. *J Dent Res* 83: 156–160.
- Suzuki H, Suzuki Y, Narita I, Aizawa M, Kihara M, et al. (2008) Toll-like receptor 9 affects severity of IgA nephropathy. *J Am Soc Nephrol* 19: 2384–2395.
- Kawagoe T, Takeuchi O, Takabatake Y, Kato H, Isaka Y, et al. (2009) TANK is a negative regulator of Toll-like receptor signaling and is critical for the prevention of autoimmune nephritis. *Nat Immunol* 10: 965–972.
- Kennel-De March A, Bene MC, Hurault de Ligny B, Kessler M, Faure GC (1997) Enhanced expression of CD31 and CD54 on tonsillar high endothelial venules in IgA nephropathy. *Clin Immunol Immunopathol* 84: 158–165.
- Kodama S, Suzuki M, Arita M, Mogi G (2001) Increase in tonsillar germinal centre B-1 cell numbers in IgA nephropathy (IgAN) patients and reduced susceptibility to Fas-mediated apoptosis. *Clin Exp Immunol* 123: 301–308.
- Goto T, Bando N, Yoshizaki T, Nozawa H, Takahara M, et al. (2008) Increase in B-cell-activation factor (BAFF) and IFN-gamma productions by tonsillar mononuclear cells stimulated with deoxycytidyl-deoxyguanosine oligodeoxynucleotides (CpG-ODN) in patients with IgA nephropathy. *Clin Immunol* 126: 260–269.
- Wu T, Trevisan M, Genco RJ, Dorn JP, Falkner KL, et al. (2000) Periodontal disease and risk of cerebrovascular disease: the first national health and nutrition examination survey and its follow-up study. *Arch Intern Med* 160: 2749–2755.
- Genco RJ, Trevisan M, Wu T, Beck JD (2001) Periodontal disease and risk of coronary heart disease. *Jama* 285: 40–41.
- Arbes SJ, Jr., Slade GD, Beck JD (1999) Association between extent of periodontal attachment loss and self-reported history of heart attack: an analysis of NHANES III data. *J Dent Res* 78: 1777–1782.



56. Nakajima T, Yamazaki K (2009) Periodontal disease and risk of atherosclerotic coronary heart disease. *Odontology* 97: 84–91.
57. Xu F, Lu B Prospective association of periodontal disease with cardiovascular and all-cause mortality: NHANES III follow-up study. *Atherosclerosis* 218: 536–542.
58. Lockhart PB, Bolger AF, Papananou PN, Osinbowale O, Trevisan M, et al. (2012) Periodontal disease and atherosclerotic vascular disease: does the evidence support an independent association?: a scientific statement from the American Heart Association. *Circulation* 125: 2520–2544.
59. Kshirsagar AV, Moss KL, Elter JR, Beck JD, Offenbacher S, et al. (2005) Periodontal disease is associated with renal insufficiency in the Atherosclerosis Risk In Communities (ARIC) study. *Am J Kidney Dis* 45: 650–657.
60. Craig RG, Kotanko P, Kamer AR, Levin NW (2007) Periodontal diseases—a modifiable source of systemic inflammation for the end-stage renal disease patient on haemodialysis therapy? *Nephrol Dial Transplant* 22: 312–315.
61. Detert J, Pischon N, Burmester GR, Buttgerit F (2010) The association between rheumatoid arthritis and periodontal disease. *Arthritis Res Ther* 12: 218.
62. Pischon N, Pischon T, Kroger J, Gulmez E, Kleber BM, et al. (2008) Association among rheumatoid arthritis, oral hygiene, and periodontitis. *J Periodontol* 79: 979–986.
63. Ali J, Pramod K, Tahir MA, Ansari SH Autoimmune responses in periodontal diseases. *Autoimmun Rev* 10: 426–431.
64. Nakano K, Wada K, Nomura R, Nemoto H, Inaba H, et al. Characterization of aortic aneurysms in cardiovascular disease patients harboring *Porphyromonas gingivalis*. *Oral Dis* 17: 370–378.
65. Kozarov EV, Dorn BR, Shelburne CE, Dunn WA, Jr., Progulsk-Fox A (2005) Human atherosclerotic plaque contains viable invasive *Actinobacillus actinomycescomitans* and *Porphyromonas gingivalis*. *Arterioscler Thromb Vasc Biol* 25: e17–18.
66. Khalaf H, Bengtsson T (2012) Altered T-cell responses by the periodontal pathogen *Porphyromonas gingivalis*. *PLoS One* 7: e45192.
67. Novak J, Julian BA, Mestecky J, Renfrow MB (2012) Glycosylation of IgA1 and pathogenesis of IgA nephropathy. *Semin Immunopathol* 34: 365–382.
68. Iwatani H, Inoue T, Wada Y, Nagasawa Y, Yamamoto R, et al. (2012) Quantitative change of IgA hinge O-glycan composition is a novel marker of therapeutic responses of IgA nephropathy. *Biochem Biophys Res Commun* 428: 339–342.
